# Supplementary material
Source: Springer Nature journal article supplement (https://www.springermedizin.de/resource/supplementary/12936_2011_2042_MOESM1_ESM.pdf/9543038)

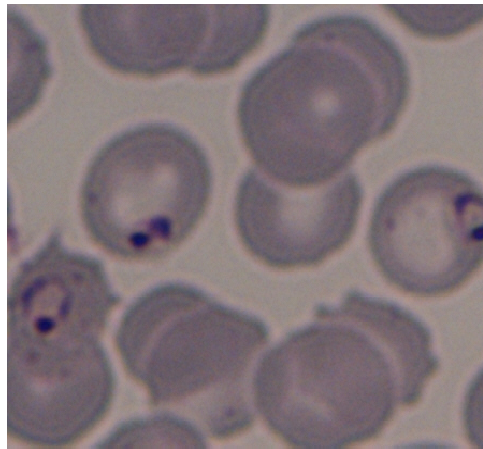

a

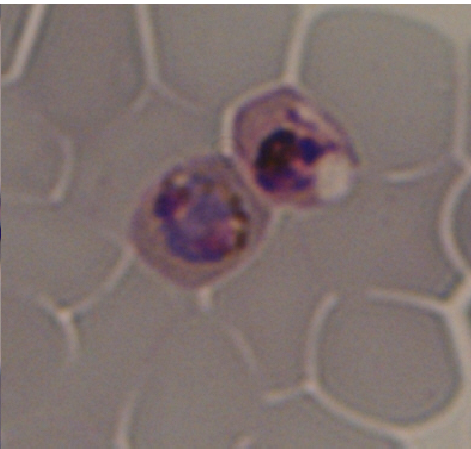

b

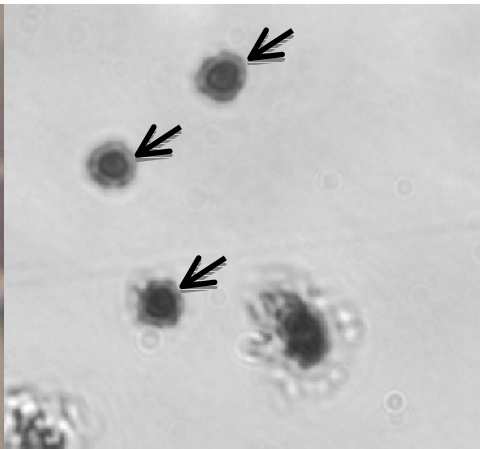

c

Supplement: MOESM1 [file 9543038]
